# Supplementary material for: Emission factors of health‐ and climate‐relevant pollutants measured in home during a carbon‐finance‐approved cookstove intervention in rural India
Source: PubMed Central journal article supplement — Geohealth. 2017 Jul 28;1(5):222–36. doi: 10.1002/2017GH000066 (PMC7007132; doi:10.1002/2017gh000066), 2017-07-28
Supplement: GH2-1-222-s001.pdf [file GH2-1-222-s001.pdf]

**Emission factors of health- and climate-relevant pollutants measured in-home during a carbon-finance-approved cookstove intervention in rural India**Andrew P. Grieshop<sup>\*a</sup>, Grishma Jain<sup>b</sup>, Karthik Sethuraman<sup>b</sup>, Julian D. Marshall<sup>c</sup><sup>a</sup> Department of Civil, Construction and Environmental Engineering, North Carolina State University, Raleigh, NC, 27695, USA<sup>b</sup> Resource Optimization Initiative, Bangalore, Karnataka, 560 071, India<sup>c</sup> Department of Civil and Environmental Engineering, University of Washington, Seattle, WA 98195, USA<sup>\*</sup> Address correspondence to: Andrew P. Grieshop, Department of Civil, Construction and Environmental Engineering, North Carolina State University, 431B Mann Hall, Raleigh, NC 27696-7908, USA. Email: [apgriesh@ncsu.edu](mailto:apgriesh@ncsu.edu); Ph. (919) 513-1181**Contents of this file**

Figures S1 to S8

Table S1 (separate file)

**Additional Supporting Information (Files uploaded separately)**

A spreadsheet file included as a supplement includes emission factors and other information for all tests.

**Introduction**

This supplement includes figures helpful for interpreting the results of the main manuscript. All figures are described in manuscript.

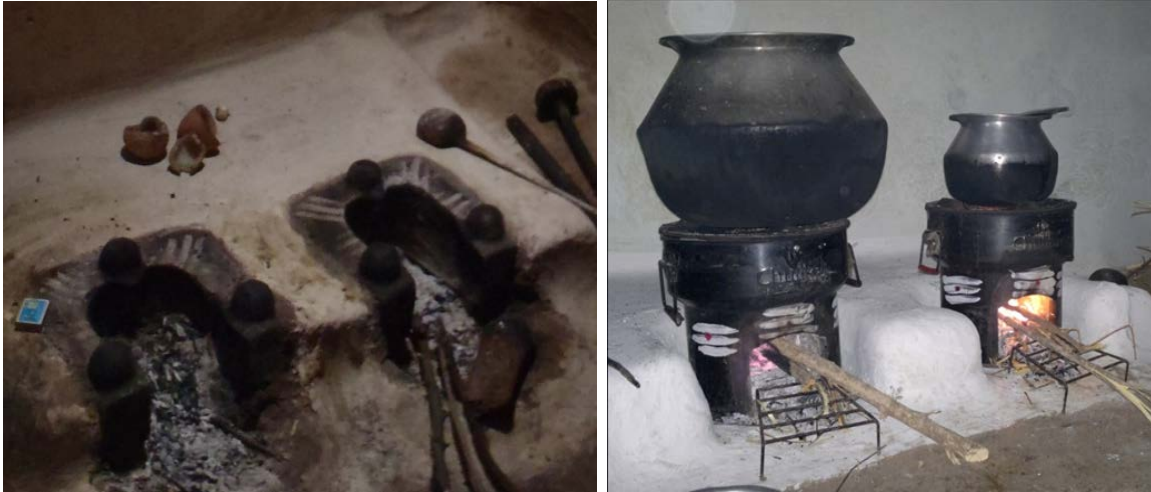

Fig. S1: Photos of traditional chulhas (left) and intervention natural draft 'rocket' stoves (right) assessed in the study.

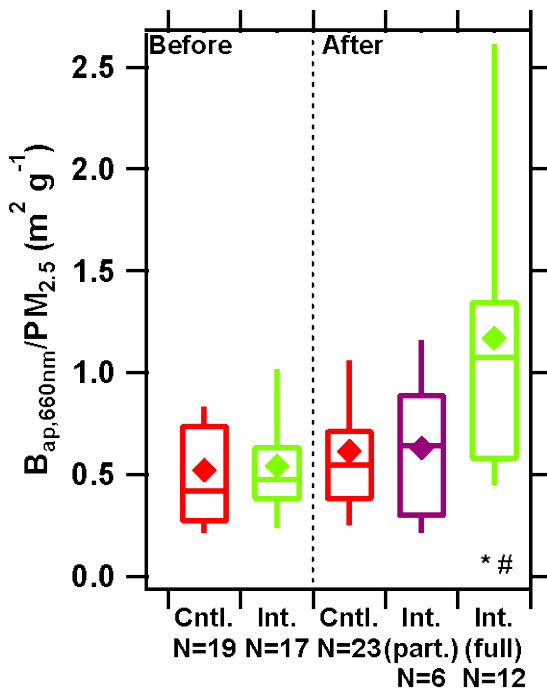

Fig. S2: Ratio of  $B_{ap}$  measured at  $\lambda=660$  nm, as measured by the PSAP to gravimetric  $PM_{2.5}$  measured during emission tests. \* and # indicate that a group mean is significantly different (one-tailed Wilcoxon rank sum test) than control group mean in same and previous seasons, respectively.

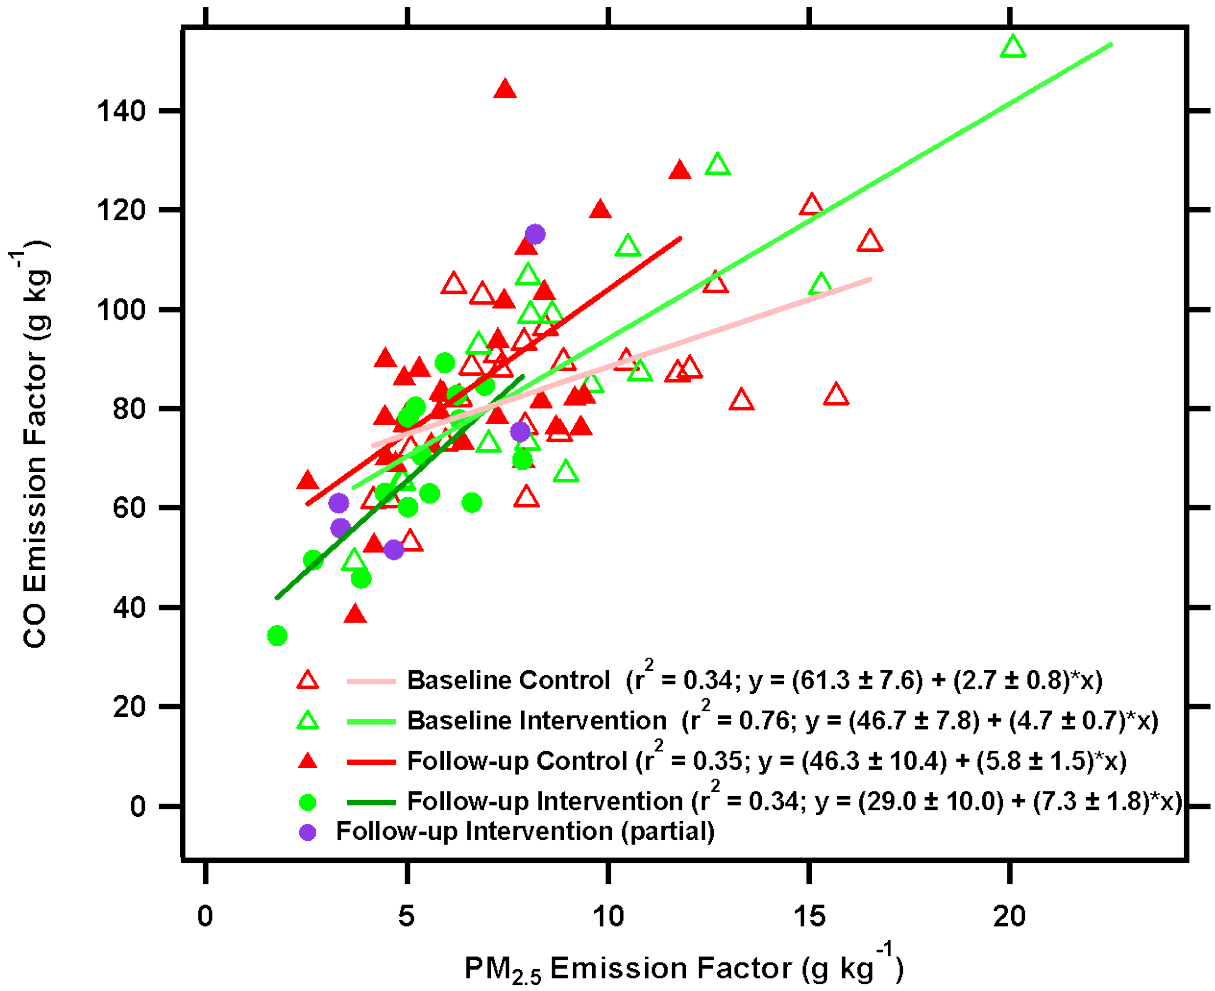

Figure S3: Scatter plot of all CO vs PM emission factors measured during campaign along with linear regressions for each group fit separately.

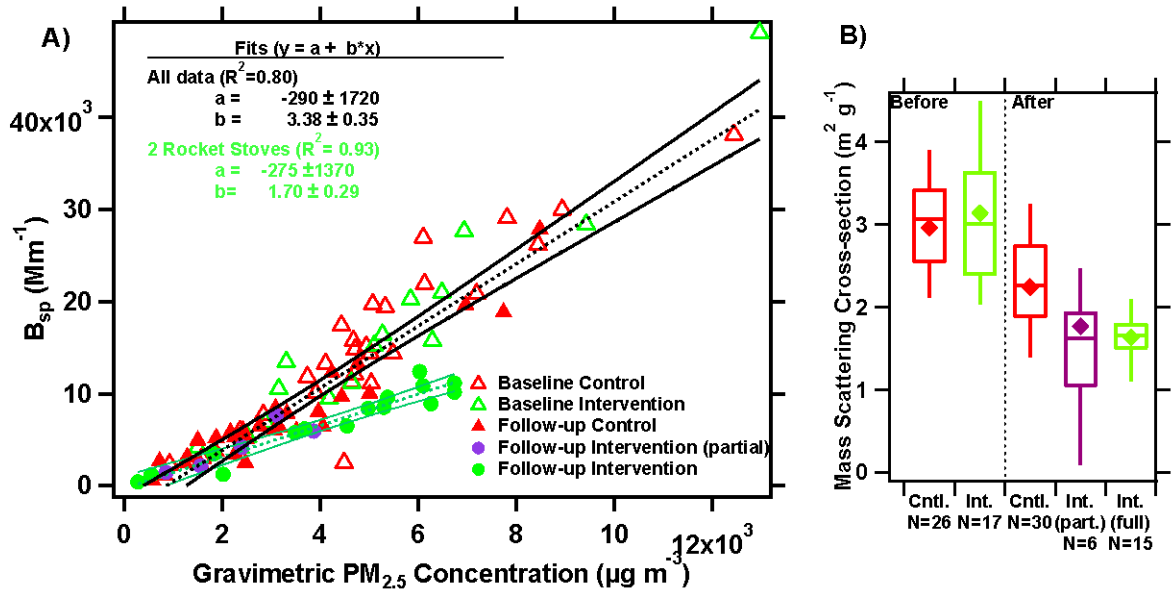

Figure S4: Plots showing relation between average particle scattering ( $B_{sp}$ ) and gravimetric PM concentration from Teflon filters measured during individual tests. Panel A) shows a scatter plot of test-average quantities and regression fits (with 95% confidence intervals) for all data (black lines) and for Season 2 tests of the 'full intervention' groups (green lines). Panel B) shows box and whisker plots of PM mass scattering cross sections (MSC; ratio of  $B_{sp}$  to PM concentration) for individual test groups. Box and whisker plots are described in main text.

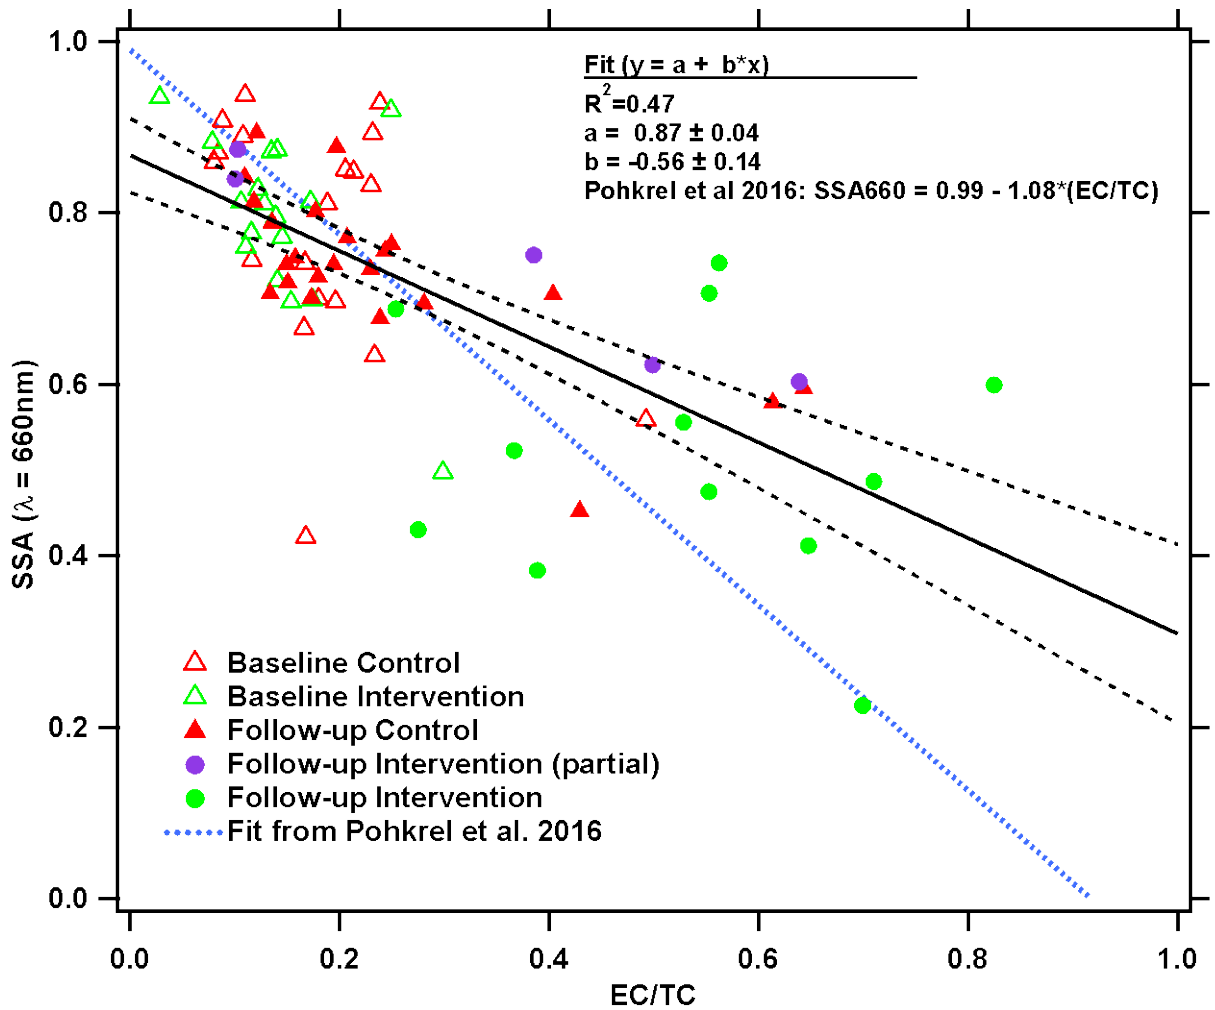

Fig. S5: Scatter plot between single scattering albedo and EC/TC, showing a reasonably strong relationship that is distinct from that found for wildland fuels determined by [Pokhrel et al., 2016]

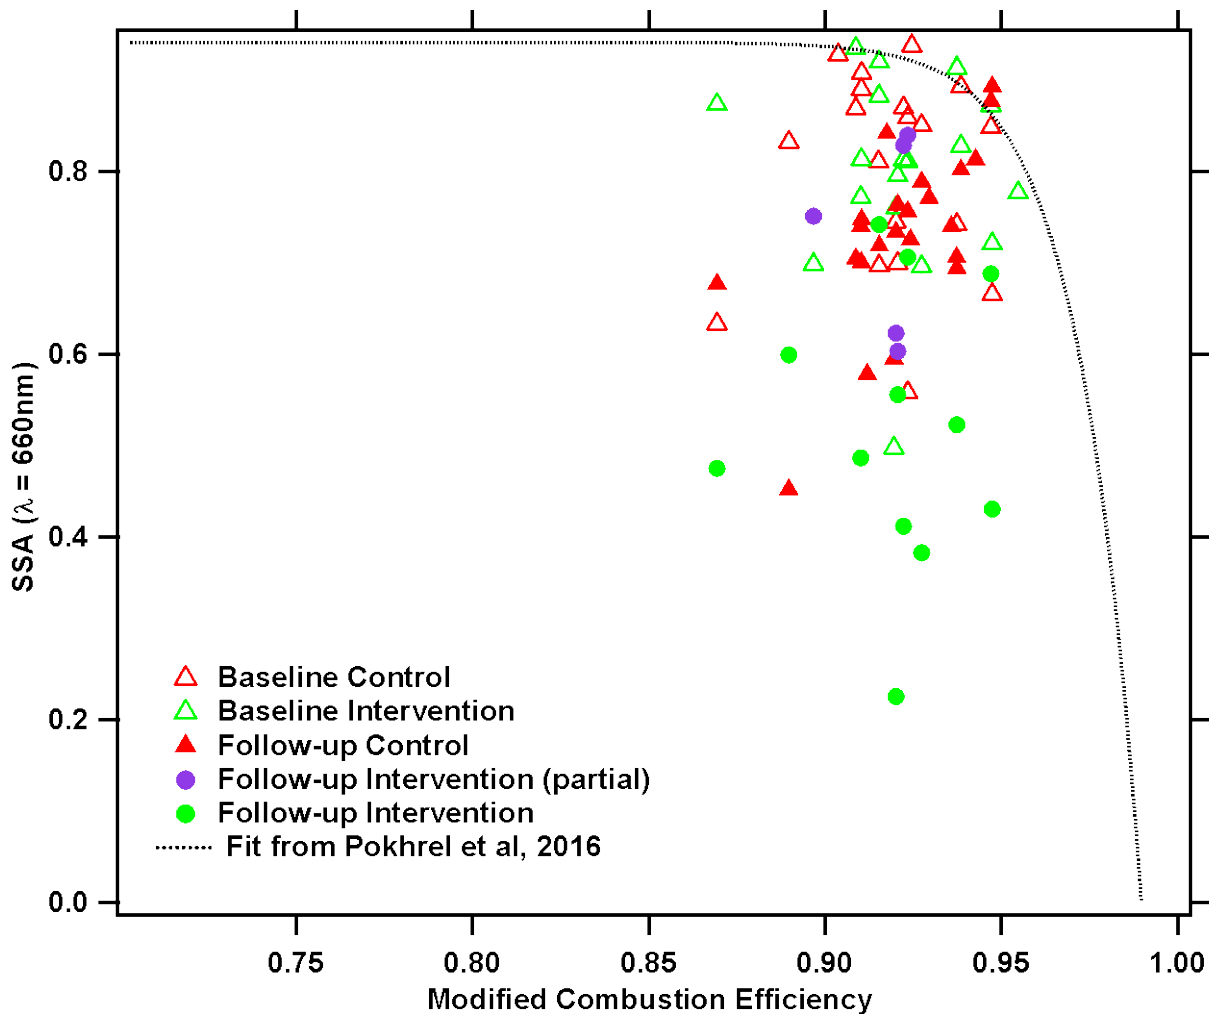

**Fig. S6: Scatter plot between single scattering albedo and MCE, showing minimal relationship. Also shown is a relationship for wildland fuel combustion from [Pokhrel et al., 2016].**

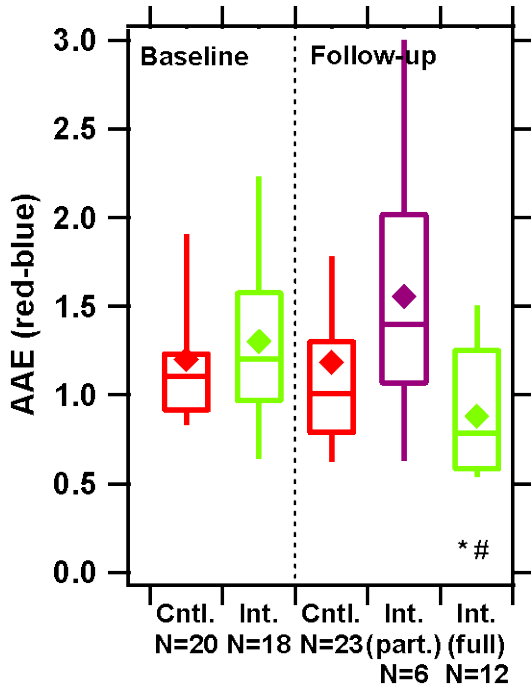

Figure S7: Angstrom absorption exponent (AAE) from test groups. AAE is estimated from absorption at  $\lambda = 660$  and  $467$  nm as measured by the PSAP, as discussed in the text. \* and # indicate that a group mean is significantly different (one-tailed Wilcoxon rank sum test) than control group mean in same and previous seasons, respectively.

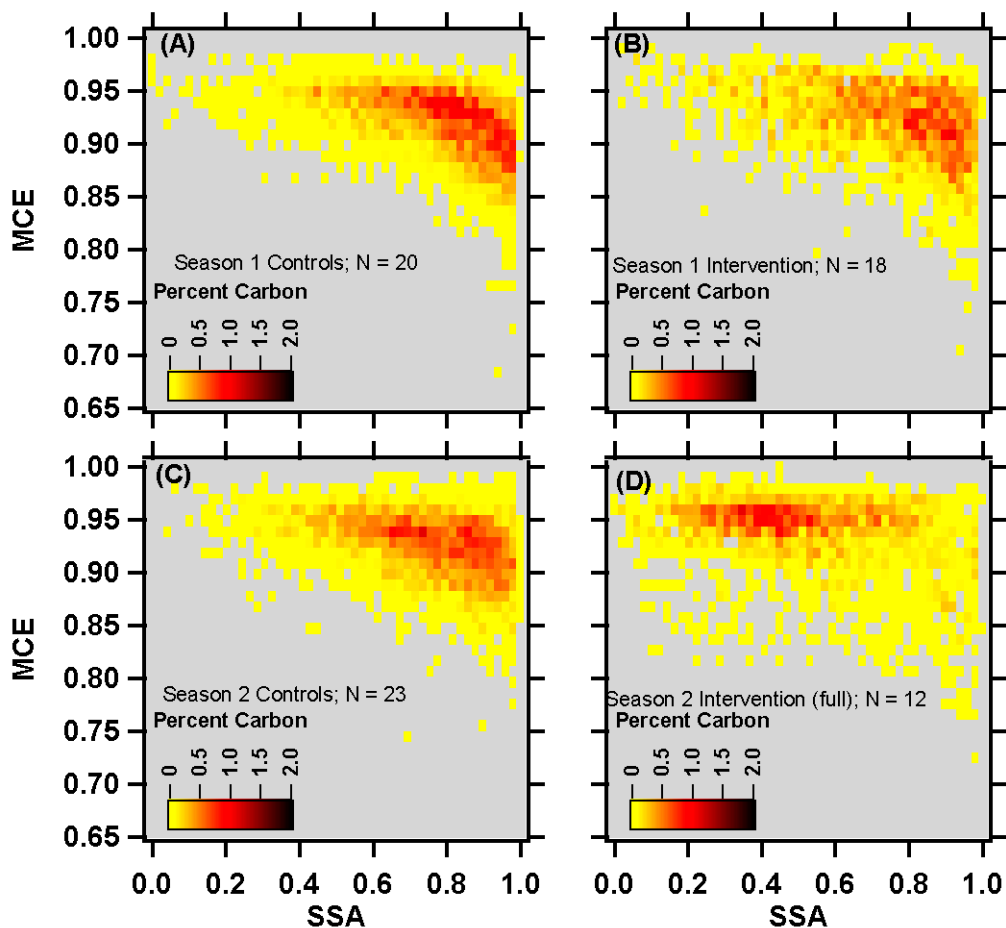

**Figure S8:** Bivariate histograms showing percentage of carbon consumed during combustion events with given MCE and SSA values. These are similar to PaRTED plots discussed in text, but weighted by background-corrected carbon ( $\Delta\text{CO}_2 + \Delta\text{CO}$ ) concentration during a combustion event, rather than  $\text{IEF}_{\text{scat}}$ .

**Table S1.** Emission factors and other quantities for all tests described in paper.
